# Supplementary material for: Metal–organic frameworks with rare topologies: lonsdaleite-type metal formates and their magnetic properties
Source: Royal Society of Chemistry journal article supplement (doi:10.1039/c1ce05031a), 2011-01-01
Supplement: c1ce05031a.pdf [file c1ce05031a.pdf]

## Electronic Supplementary Information

### Metal-organic frameworks with rare topologies: lonsdaleite-typed metal formates and their magnetic properties

Hyunuk Kim,<sup>a</sup> Yinyong Sun,<sup>a</sup> Yonghwi Kim,<sup>a</sup> Takashi Kajiwara,<sup>b</sup> Masahiro Yamashita,<sup>\*b</sup> and Kimoon Kim<sup>\*a</sup>

<sup>a</sup>National Creative Research Initiative Center for Smart Supramolecules (CSS), Department of Chemistry and Division of Advanced Materials Science (WCU project), Pohang University of Science and Technology (POSTECH), Pohang 790-784, Republic of Korea. <sup>b</sup>Department of Chemistry, Graduate School of Science, Tohoku University, 6-3 Aza-Aoba, Aramaki, Aoba-ku, Sendai 980-8578, Japan

E-mail: kkim@postech.ac.kr or yamasita@agnus.chem.tohoku.ac.jp

#### General Methods

All the reagents and solvents were purchased from commercial sources and used without further purification. Solvothermal reactions were carried out in sealed glass tubes. The single-crystal X-ray diffraction data of  $[M_6(\text{HCOO})_{12}] \cdot \text{DEF}$  ( $M = \text{Mg}^{2+}$  (**1**),  $\text{Fe}^{2+}$  (**2**),  $\text{Co}^{2+}$  (**3**),  $\text{Zn}^{2+}$  (**4**)) were collected on a Siemens SMART CCD diffractometer equipped with a graphite-monochromated MoK $\alpha$  ( $\lambda = 0.71073 \text{ \AA}$ ) radiation source. The magnetic susceptibilities of **2** and **3** were measured with a SQUID magnetometer (Quantum Design MPMS-7) in the temperature range of 2-300 K.

#### Synthesis

**[Mg<sub>6</sub>(HCOO)<sub>12</sub>]·DEF, 1:** A solution of  $\text{Mg}(\text{ClO}_4)_2 \cdot 6\text{H}_2\text{O}$  (0.663 g, 2.0 mmol) and HCOOH (184 mg, 4.0 mmol) in DEF solution (12 mL) was heated at 110°C in a sealed glass tube. After 48 h colorless crystals were collected to give **1** (0.156 g, 50%). Anal. Calcd. for **1**: C, 25.94; H, 2.94; N, 1.78, Found: C, 25.76; H, 2.96; N, 1.79.

**[Fe<sub>6</sub>(HCOO)<sub>12</sub>]·DEF, 2:** A solution of  $\text{FeCl}_2 \cdot 6\text{H}_2\text{O}$  (0.740 g, 3.2 mmol) and HCOOH (184 mg, 4.0 mmol) in DEF solution (18 mL) was heated in a teflon-lined steel bomb at 110°C for 2 days. After 2 days pale brown colorless crystals were collected to give **2** (0.247 g, 72%). Anal. Calcd. for **2**: C, 20.91; H, 2.37; N, 1.43, Found: C, 21.06; H, 2.52; N, 1.64.

**[Co<sub>6</sub>(HCOO)<sub>12</sub>]·DEF, 3:** A solution of  $\text{Co}(\text{ClO}_4)_2 \cdot 6\text{H}_2\text{O}$  (0.732 g, 2.0 mmol) and HCOOH (184 mg, 4.0 mmol) in DEF solution (12 mL) was heated at 100°C in a sealed glass tube. After 36 h pink crystals were collected to give **3** (0.153 g, 46 %). Anal. Calcd. for **3**: C, 20.52; H, 2.33; N, 1.41 Found: C, 20.40; H, 2.48; N, 1.47.

**[Zn<sub>6</sub>(HCOO)<sub>12</sub>]·DEF, 4:** A solution of  $\text{Zn}(\text{ClO}_4)_2 \cdot 6\text{H}_2\text{O}$  (0.745 g, 2.0 mmol) and HCOOH (184 mg, 4.0 mmol) in DEF solution (12 mL) was heated at 100°C for 24 h in a sealed glass tube and then was naturally cooled down to room temperature. After 24 h colorless crystals were collected to give **4** (0.247 g, 72%). Anal. Calcd. for **4**: C, 19.75; H, 2.24; N, 1.36, Found: C, 19.36; H, 2.42; N, 1.43.

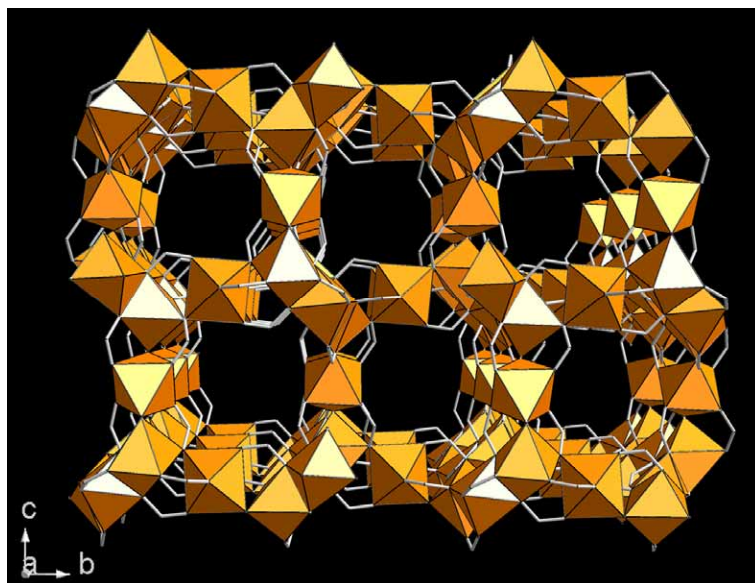

**Figure S1.** X-ray crystal structures of the metal-formates **1–4** with the **ion** net showing channels along the *a* axis. Guest molecules and hydrogen atoms are omitted for clarity.

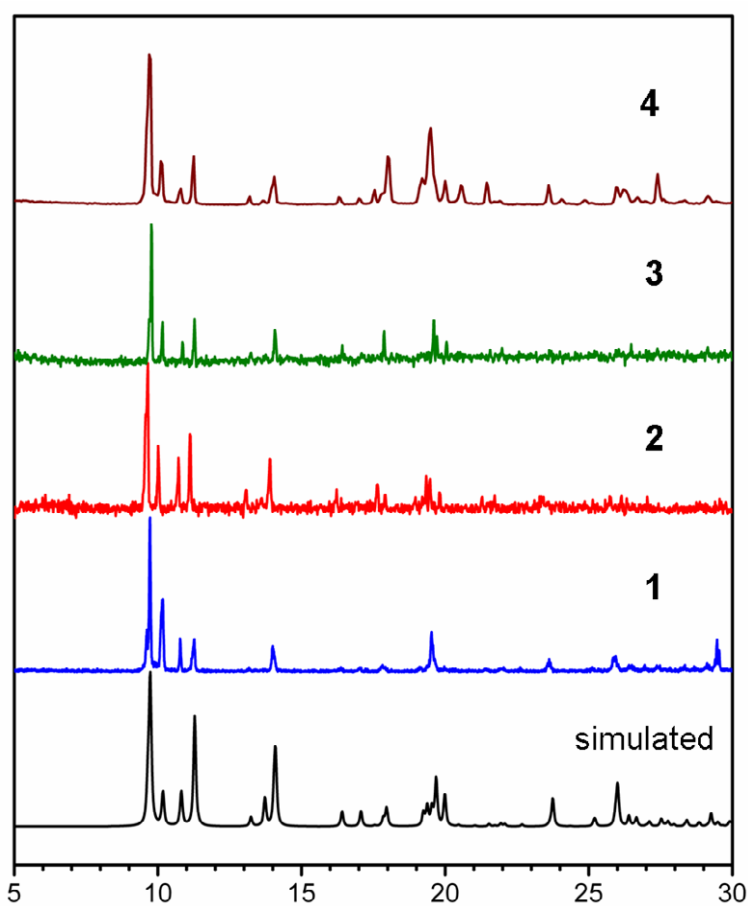

**Figure S2.** Powder XRD profiles for  $[M_6(\text{HCOO})_{12}] \cdot \text{DEF}$  ( $M = \text{Mg}^{2+}$  (**1**),  $\text{Fe}^{2+}$  (**2**),  $\text{Co}^{2+}$  (**3**),  $\text{Zn}^{2+}$  (**4**)).

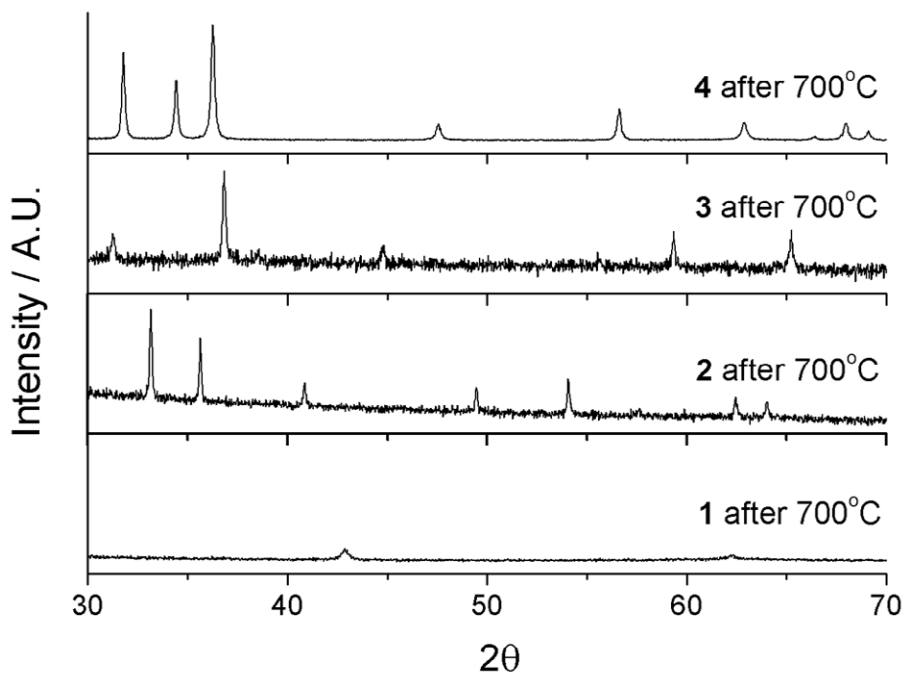

**Figure S3.** Powder XRD profiles for metal oxides after heating of  $[M_6(\text{HCOO})_{12}] \cdot \text{DEF}$  ( $M = \text{Mg}^{2+}$  (1),  $\text{Fe}^{2+}$  (2),  $\text{Co}^{2+}$  (3),  $\text{Zn}^{2+}$  (4)).

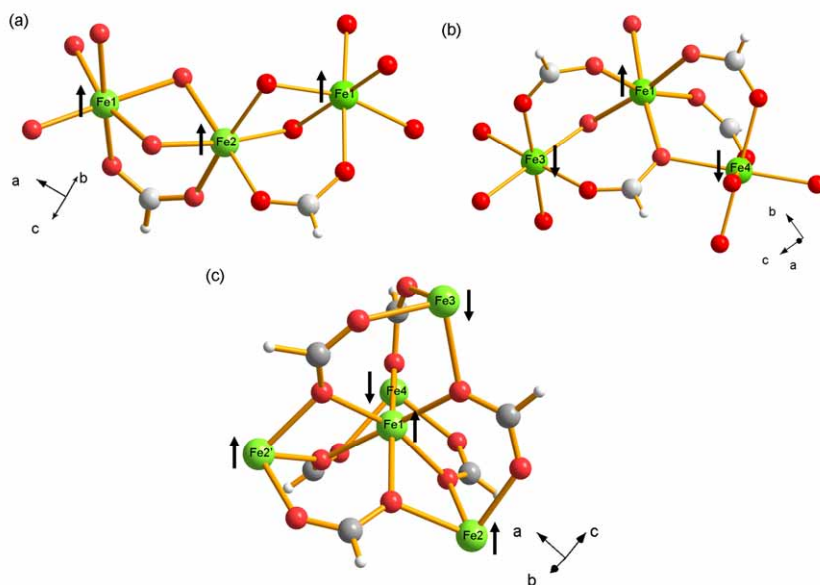

**Figure S4.** A fragment of **2** showing magnetic ordering. (a) ferromagnetic interactions; Fe1–O–Fe2, (b) antiferromagnetic interactions; Fe3–O–Fe1, Fe1–O–Fe4, (c) magnetic ordering in Fe-centered  $\text{FeFe}_4$  tetrahedron.

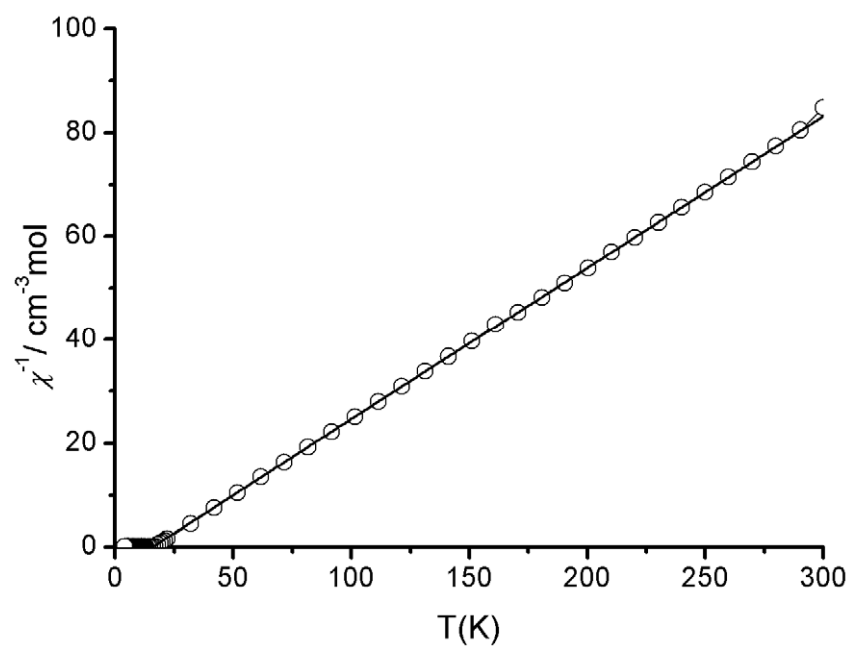

**Figure S5.** A plot of  $\chi^{-1}$  vs  $T$  for **2**; the solid line is the best fit based on the Curie-Weiss Law with  $C = 3.417$  and  $3.460 \text{ cm}^3\text{Kmol}^{-1}$ ,  $\Theta = 15.79$ .
